# Supplementary material for: Novel Trypanosomatid-Bacterium Association: Evolution of Endosymbiosis in Action
Source: PubMed Central journal article supplement — mBio. 2016 Mar 15;7(2):e01985-15. doi: 10.1128/mBio.01985-15 (PMC4807368; doi:10.1128/mbio.01985-15), 2016-03-15
Supplement: mbo001162713st1.pdf [file mbo001162713st1.pdf]

| <b>Morphotype</b>      | <b>Cell length</b>      | <b>Cell width</b>      | <b>Nucleus</b>         | <b>K-A</b>             | <b>N-A</b>             | <b>Flagellum</b>         |
|------------------------|-------------------------|------------------------|------------------------|------------------------|------------------------|--------------------------|
| <b>Promastigote</b>    | 13.9 ± 1.9<br>(10.9-18) | 2.3 ± 0.6<br>(1.3-4.8) | 2.0 ± 0.3<br>(1.2-2.9) | 3.0 ± 0.5<br>(1.8-4.2) | 7.4 ± 1.1<br>(5.3-9.3) | 12.5 ± 2.5<br>(7.8-19.5) |
| <b>Choanomastigote</b> | 6.7 ± 1.3<br>(4.5-9.7)  | 4.2 ± 0.7<br>(2.8-6.4) | 2.0 ± 0.3<br>(1.4-2.5) | 2.2 ± 0.6<br>(0.6-3.8) | 4.2 ± 1.0<br>(2.6-6.6) | 13.0 ± 2.3<br>(8.6-20.4) |
| <b>Amastigote-like</b> | 6.7 ± 0.8<br>(5.2-8.5)  | 5.5 ± 1.0<br>(3.2-7.5) | 2.1 ± 0.3<br>(1.2-2.7) | 3.1 ± 0.8<br>(1.2-4.6) | 4.8 ± 0.8<br>(2.5-6.4) | NA                       |
