# Supplementary material for: Novel Trypanosomatid-Bacterium Association: Evolution of Endosymbiosis in Action
Source: PubMed Central journal article supplement — mBio. 2016 Mar 15;7(2):e01985-15. doi: 10.1128/mBio.01985-15 (PMC4807368; doi:10.1128/mbio.01985-15), 2016-03-15
Supplement: mbo001162713st2.pdf [file mbo001162713st2.pdf]

| Laboratory       | Medium                   | Plate | Clone | Bacteria-free cells, % |
|------------------|--------------------------|-------|-------|------------------------|
| Ostrava          | M199 pH 5.5              | 1     | O1    | 4.5                    |
|                  |                          |       | O2    | 10.0                   |
|                  |                          |       | O3    | 5.1                    |
|                  |                          |       | O4    | 14.8                   |
|                  |                          |       | O5    | 1.5                    |
|                  |                          |       | O6    | 0.0                    |
|                  |                          |       | O7    | 15.6                   |
|                  |                          |       | O8    | 0.0                    |
|                  |                          |       | O9    | 3.4                    |
|                  |                          |       | O10   | 0.0                    |
|                  |                          |       | O11   | 1.6                    |
|                  | M199 pH 7.4              | 2     | O12   | 13.1                   |
|                  |                          |       | O13   | 3.1                    |
|                  |                          |       | O14   | 8.8                    |
|                  | M199 pH 7.4, conditioned | 3     | O15   | 5.6                    |
|                  |                          |       | O16   | 3.2                    |
|                  |                          |       | O17   | 8.0                    |
| Prague           | BHI + RPMI               | 1     | P1    | 5.0                    |
|                  |                          |       | P2    | 8.0                    |
|                  |                          |       | P3    | 15.0                   |
|                  |                          |       | P4    | 5.0                    |
|                  |                          | 2     | P5    | 2.0                    |
|                  |                          |       | P6    | 15.0                   |
|                  |                          | 3     | P7    | 15.0                   |
|                  |                          |       | P8    | 8.0                    |
|                  |                          |       | P9    | 10.0                   |
|                  |                          |       | P10   | 8.0                    |
|                  |                          | 4     | P11   | 20.0                   |
|                  |                          |       | P12   | 12.0                   |
|                  |                          |       | P13   | 15.0                   |
|                  |                          |       | P14   | 8.0                    |
| České Budějovice | RPMI                     | 1     | B1    | 0.0                    |
|                  |                          |       | B2    | 4.6                    |
|                  |                          | 2     | B3    | 4.6                    |
|                  |                          |       | B4    | 7.7                    |
|                  |                          | 3     | B5    | 1.5                    |
|                  |                          | 4     | B6    | 3.1                    |
|                  |                          |       | B7    | 6.2                    |
|                  |                          |       | B8    | 6.2                    |
|                  |                          |       | B9    | 3.1                    |
